# Supplementary material for: COVID-19 symptoms predictive of healthcare workers’ SARS-CoV-2 PCR results
Source: PubMed Central journal article supplement (PMC7319316; doi:10.1371/journal.pone.0235460), 2020-06-26
Supplement: pone.0235460.s001.pdf [file pone.0235460.s001.pdf]

Occupational Health COVID-19/Influenza like Illness Triage Form

|                 |                                                          |                  |                                    |                                     |
|-----------------|----------------------------------------------------------|------------------|------------------------------------|-------------------------------------|
| <b>EMPLOYEE</b> | Name _____                                               | DOB _____        | Cell Phone _____                   | Date/Time of Employee Contact _____ |
|                 | Role _____                                               | Department _____ | Supervisor/Contact info _____      |                                     |
|                 | Have you called the COVID hotline before? Y N Date _____ |                  | Currently: ___ At work ___ At home |                                     |
|                 | Last Shift Worked: _____                                 |                  |                                    |                                     |

|                                                                                    |                                                                                                                                                      |                                                                                             |                                                     |      |             |               |  |
|------------------------------------------------------------------------------------|------------------------------------------------------------------------------------------------------------------------------------------------------|---------------------------------------------------------------------------------------------|-----------------------------------------------------|------|-------------|---------------|--|
| <b>EXPOSURE</b>                                                                    | <input type="checkbox"/> Close contact (< 6 ft for ≥ 10 min) with PUI or COVID+ w/out adequate PPE:<br>Patient    Employee    Household    Community |                                                                                             | <i>If patient, employee, or household exposure:</i> |      |             |               |  |
|                                                                                    | <input type="checkbox"/> Travel within last 2 weeks (dates/locations):                                                                               |                                                                                             | Self: PPE?                                          | Gown | Face Shield | Gloves        |  |
|                                                                                    |                                                                                                                                                      |                                                                                             | Mask usage?                                         | N95  | Surgical    | Cloth    None |  |
|                                                                                    |                                                                                                                                                      |                                                                                             | Contact: Mask usage?                                | N95  | Surgical    | Cloth    None |  |
| Previous tests for COVID-19?<br>Result _____ Date _____<br>Result _____ Date _____ |                                                                                                                                                      | Any aerosolizing testing/procedures? Y N<br><br>Household Contacts (include ages/symptoms): |                                                     |      |             |               |  |

|                                                                        |                                                                   |
|------------------------------------------------------------------------|-------------------------------------------------------------------|
| <b>SYMPTOMS</b>                                                        | Sx Start Date: _____                                              |
|                                                                        | Performing job duties while symptomatic? Y N                      |
|                                                                        | <input type="checkbox"/> Fever (subjective OR measured ≥ 99.5 °F) |
|                                                                        | <input type="checkbox"/> Temp measured _____ °F                   |
|                                                                        | <input type="checkbox"/> Cough                                    |
|                                                                        | <input type="checkbox"/> Shortness of breath                      |
| <input type="checkbox"/> Myalgia (muscle pains)                        |                                                                   |
| <input type="checkbox"/> Malaise (fatigue/feeling tired)               |                                                                   |
| <input type="checkbox"/> Sore throat                                   |                                                                   |
| <input type="checkbox"/> Runny nose / nasal congestion                 |                                                                   |
| <input type="checkbox"/> Nausea   Vomiting   Diarrhea (check & circle) |                                                                   |
| <input type="checkbox"/> Rash                                          |                                                                   |
| <input type="checkbox"/> Loss of smell or taste                        |                                                                   |
| <input type="checkbox"/> Headache                                      |                                                                   |
| <input type="checkbox"/> Other: _____                                  |                                                                   |

\_\_\_\_\_  
RN Name

\_\_\_\_\_  
Signature

\_\_\_\_\_  
Date

|                   |                                                                                                                                                                                          |                                                                                                                     |
|-------------------|------------------------------------------------------------------------------------------------------------------------------------------------------------------------------------------|---------------------------------------------------------------------------------------------------------------------|
| <b>MANAGEMENT</b> | <input type="checkbox"/> Cleared to RTW <input type="checkbox"/> No restrictions _____<br><input type="checkbox"/> With restrictions: ___ Mask ___ Avoid contact with high risk patients | Dates:<br>OCC HEALTH RTW: _____ or TODAY<br><br>OCC HEALTH PLACED OOW: TODAY<br><br>7D AFTER POS. CONTACT Dx: _____ |
|                   | <input type="checkbox"/> Cleared to RTW + COVID-19 testing (asymptomatic employees)                                                                                                      |                                                                                                                     |
|                   | <input type="checkbox"/> OOW + COVID-19 testing                                                                                                                                          |                                                                                                                     |
|                   | <input type="checkbox"/> OOW: If remains asymptomatic, test 7 days after household contact diagnosed (if can isolate)<br>If develops symptoms, call back for testing                     |                                                                                                                     |
|                   | <input type="checkbox"/> OOW: _____                                                                                                                                                      |                                                                                                                     |

\_\_\_\_\_  
MD Name

\_\_\_\_\_  
Signature

\_\_\_\_\_  
Date

|                 |                                                                                                                              |                       |                                                   |
|-----------------|------------------------------------------------------------------------------------------------------------------------------|-----------------------|---------------------------------------------------|
| <b>GUIDANCE</b> | <input type="checkbox"/> Anticipatory guidance on self-monitoring, hand hygiene, droplet precaution, preventing transmission | <b>ADMINISTRATIVE</b> | <input type="checkbox"/> Manager informed         |
|                 | <input type="checkbox"/> Self-isolation until Occ Health notifies about test result                                          |                       | <input type="checkbox"/> Entered into spreadsheet |
|                 | <input type="checkbox"/> Able to self-quarantine for prescribed period of time from last contact                             |                       | _____<br>Initials                                 |
|                 | <input type="checkbox"/> Employee updated on management & guidance<br>RN initials _____                                      |                       |                                                   |
